# Supplementary material for: Prognostic value of high EZH2 expression in patients with different types of cancer: a systematic review with meta-analysis
Source: PubMed Central journal article supplement (PMC4826228; doi:10.18632/oncotarget.6612), 2015-12-14
Supplement: oncotarget-07-4584-s001.pdf [file oncotarget-07-4584-s001.pdf]

SUPPLEMENTARY FIGURES

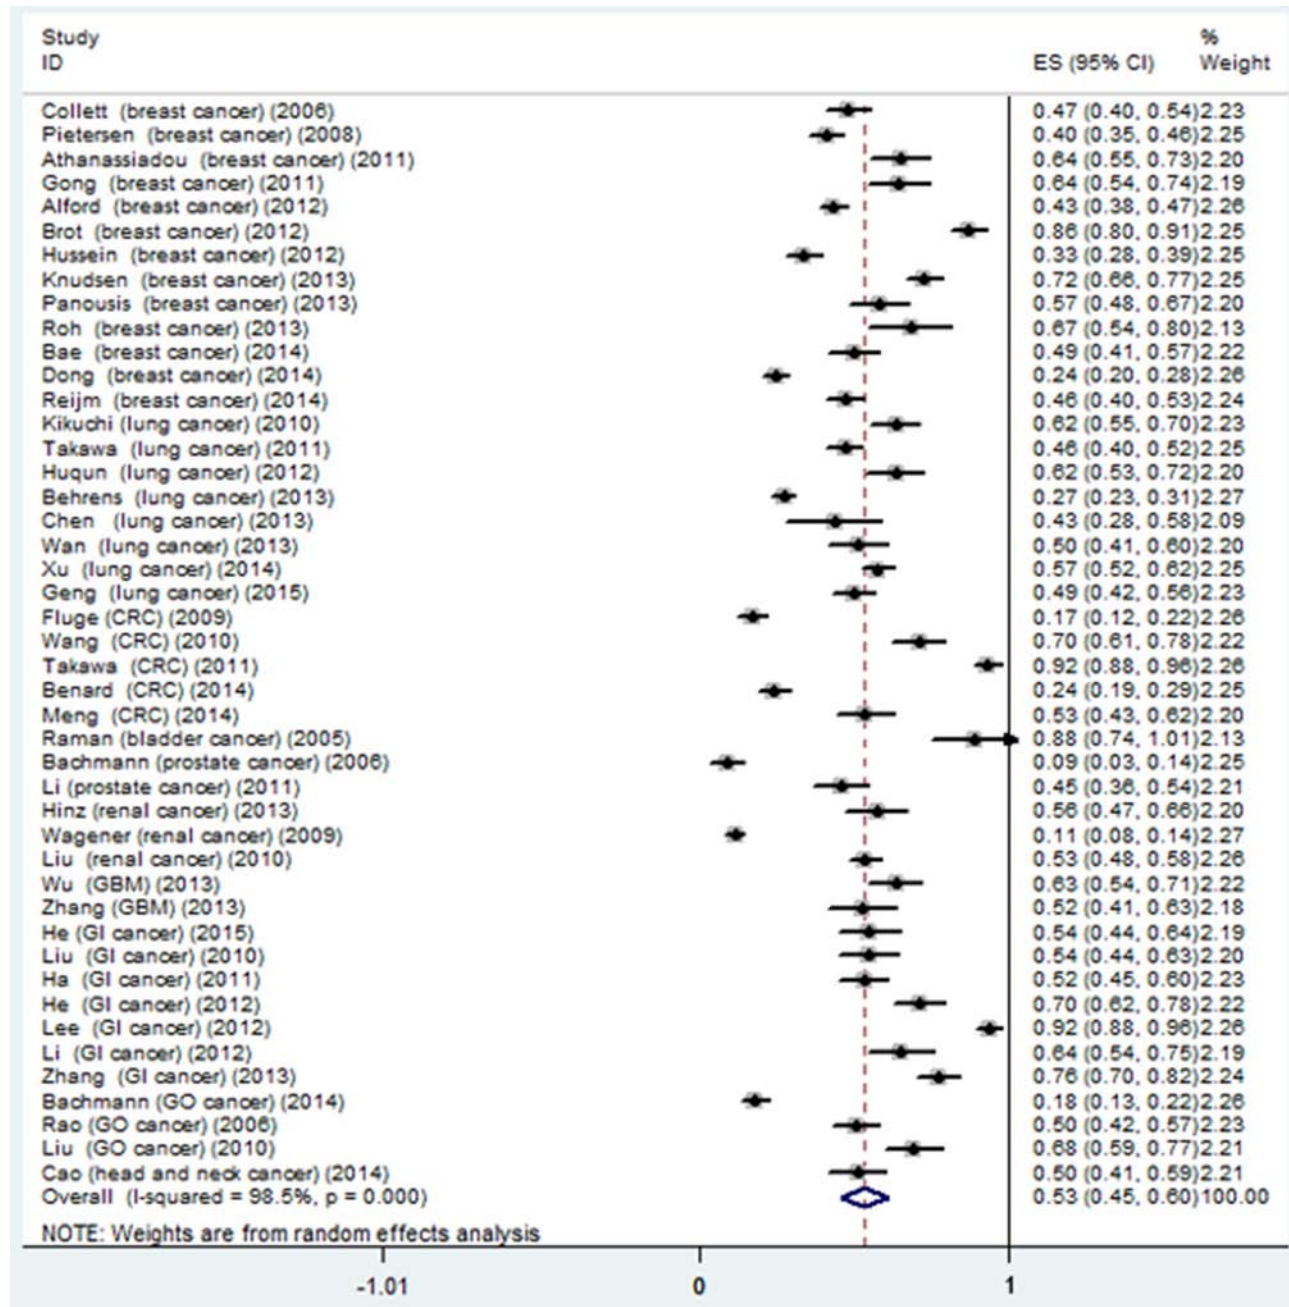

Supplementary Figure S1: Meta-analysis of the prevalence of EZH2 high expression by same test method.

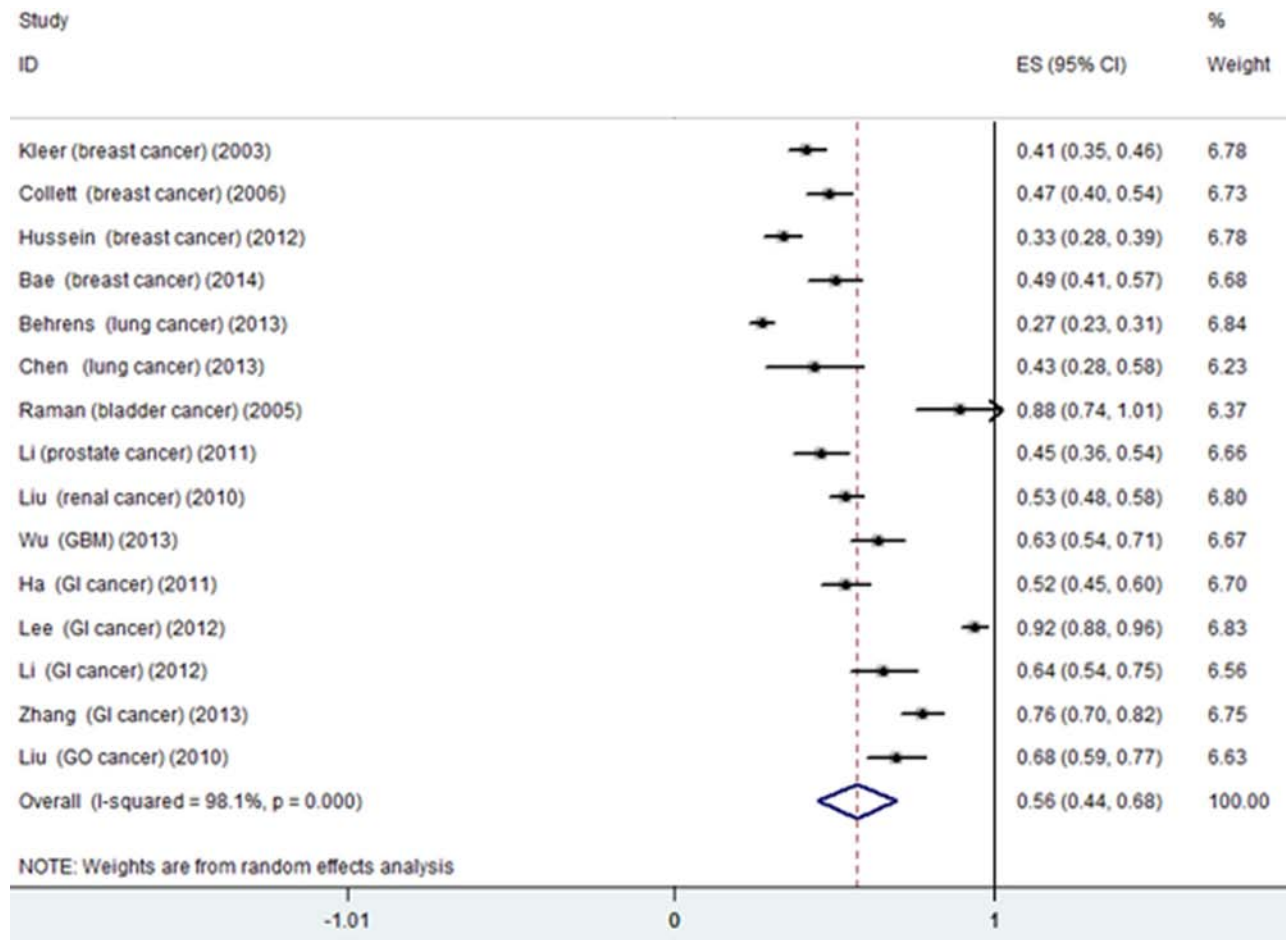

Supplementary Figure S2: Meta-analysis of the prevalence of EZH2 high expression by same definition of EZH2 high expression.
